# Supplementary material for: Behavioral and brain- transcriptomic synchronization between the two opponents of a fighting pair of the fish Betta splendens
Source: PLoS Genet. 2020 Jun 17;16(6):e1008831. doi: 10.1371/journal.pgen.1008831 (PMC7299326; doi:10.1371/journal.pgen.1008831)
Supplement: S15 Table — (XLSX) [file pgen.1008831.s023.xlsx]

## Sheet: Sheet1
	Table S15. Behavioral matrix for the WGCNA analaysis
		Sample	Before	D20	D60
		B_1	1	0	0
		B_2	1	0	0
		B_3	1	0	0
		B_4	1	0	0
		B_5	1	0	0
		D20_11	0	1	0
		D20_12	0	1	0
		D20_21	0	1	0
		D20_22	0	1	0
		D20_31	0	1	0
		D20_32	0	1	0
		D20_41	0	1	0
		D20_42	0	1	0
		D20_51	0	1	0
		D20_52	0	1	0
		D60_11	0	0	1
		D60_12	0	0	1
		D60_21	0	0	1
		D60_22	0	0	1
		D60_31	0	0	1
		D60_32	0	0	1
		D60_41	0	0	1
		D60_42	0	0	1
		D60_51	0	0	1
		D60_52	0	0	1
